# Supplementary material for: Lithium carbonate revitalizes tumor-reactive CD8+ T cells by shunting lactic acid into mitochondria
Source: PubMed Central journal article supplement (PMC10907288; doi:10.1038/s41590-023-01738-0), 2024-01-23

**Figure 2a**

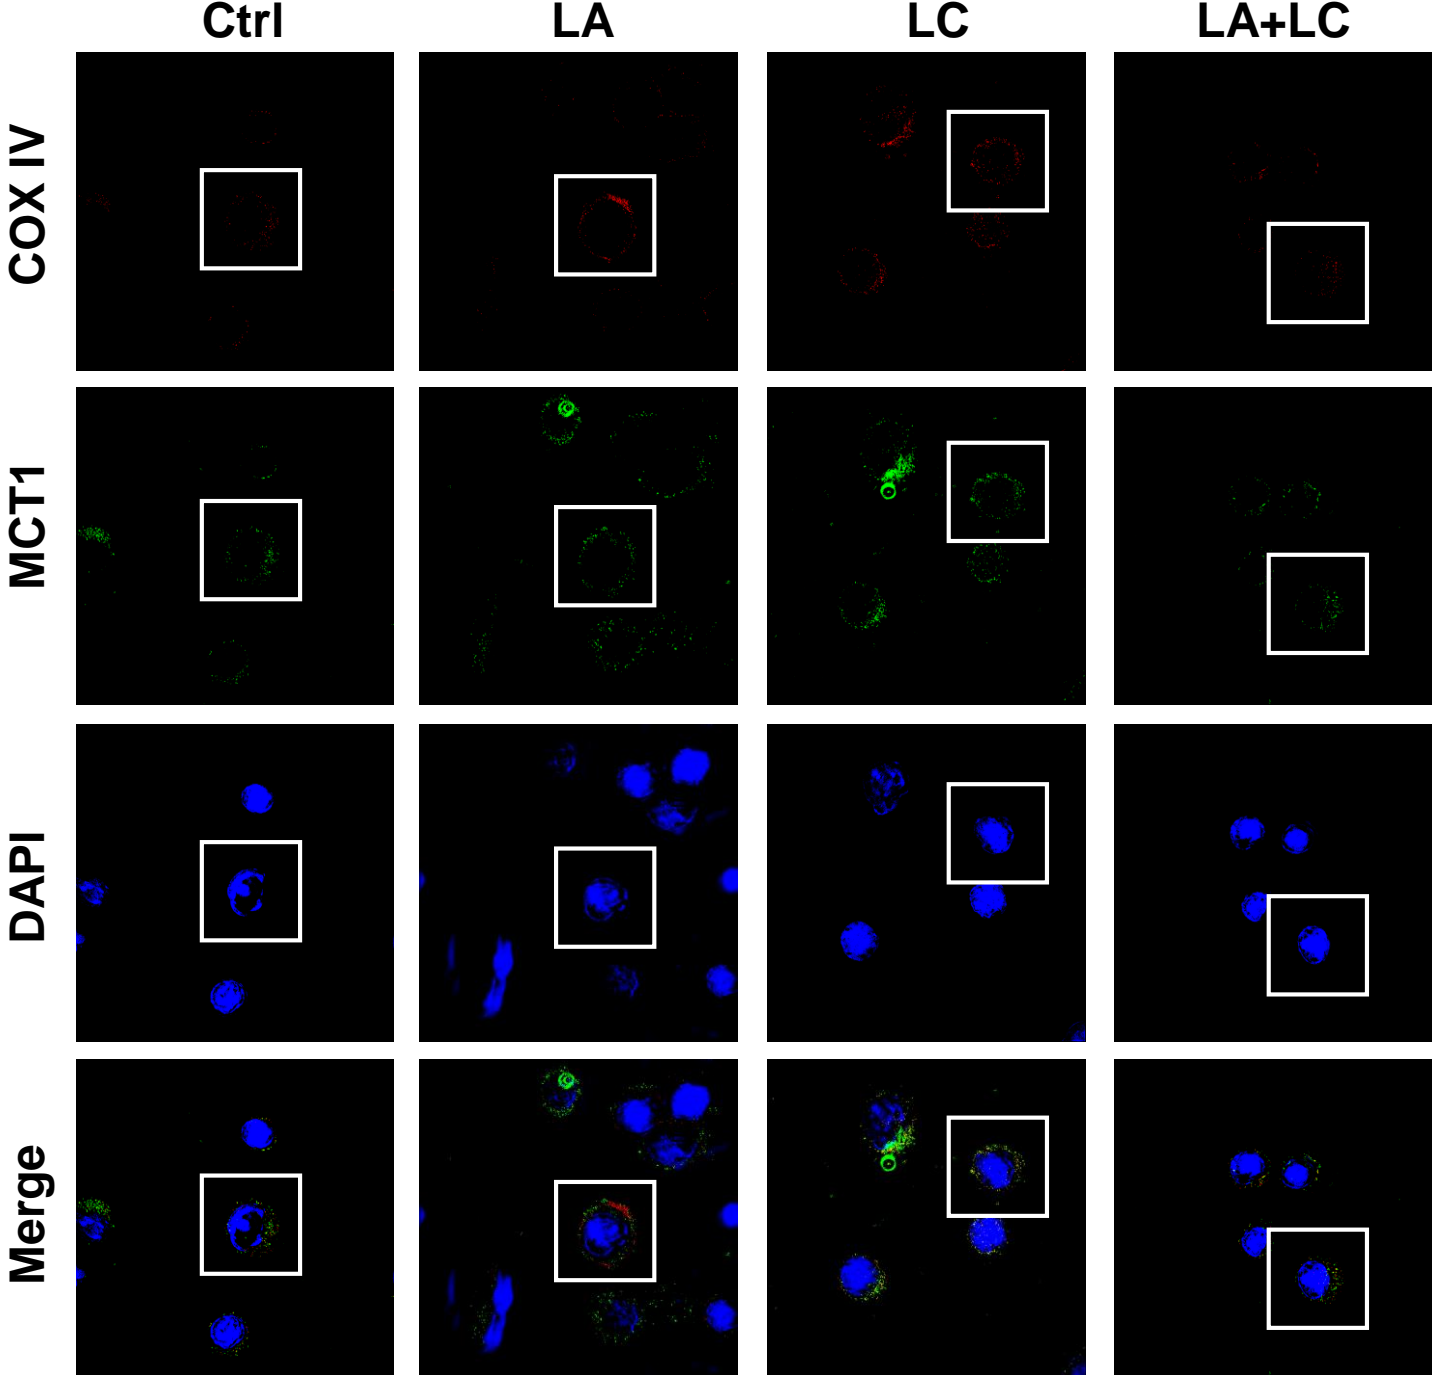

Figure 2b

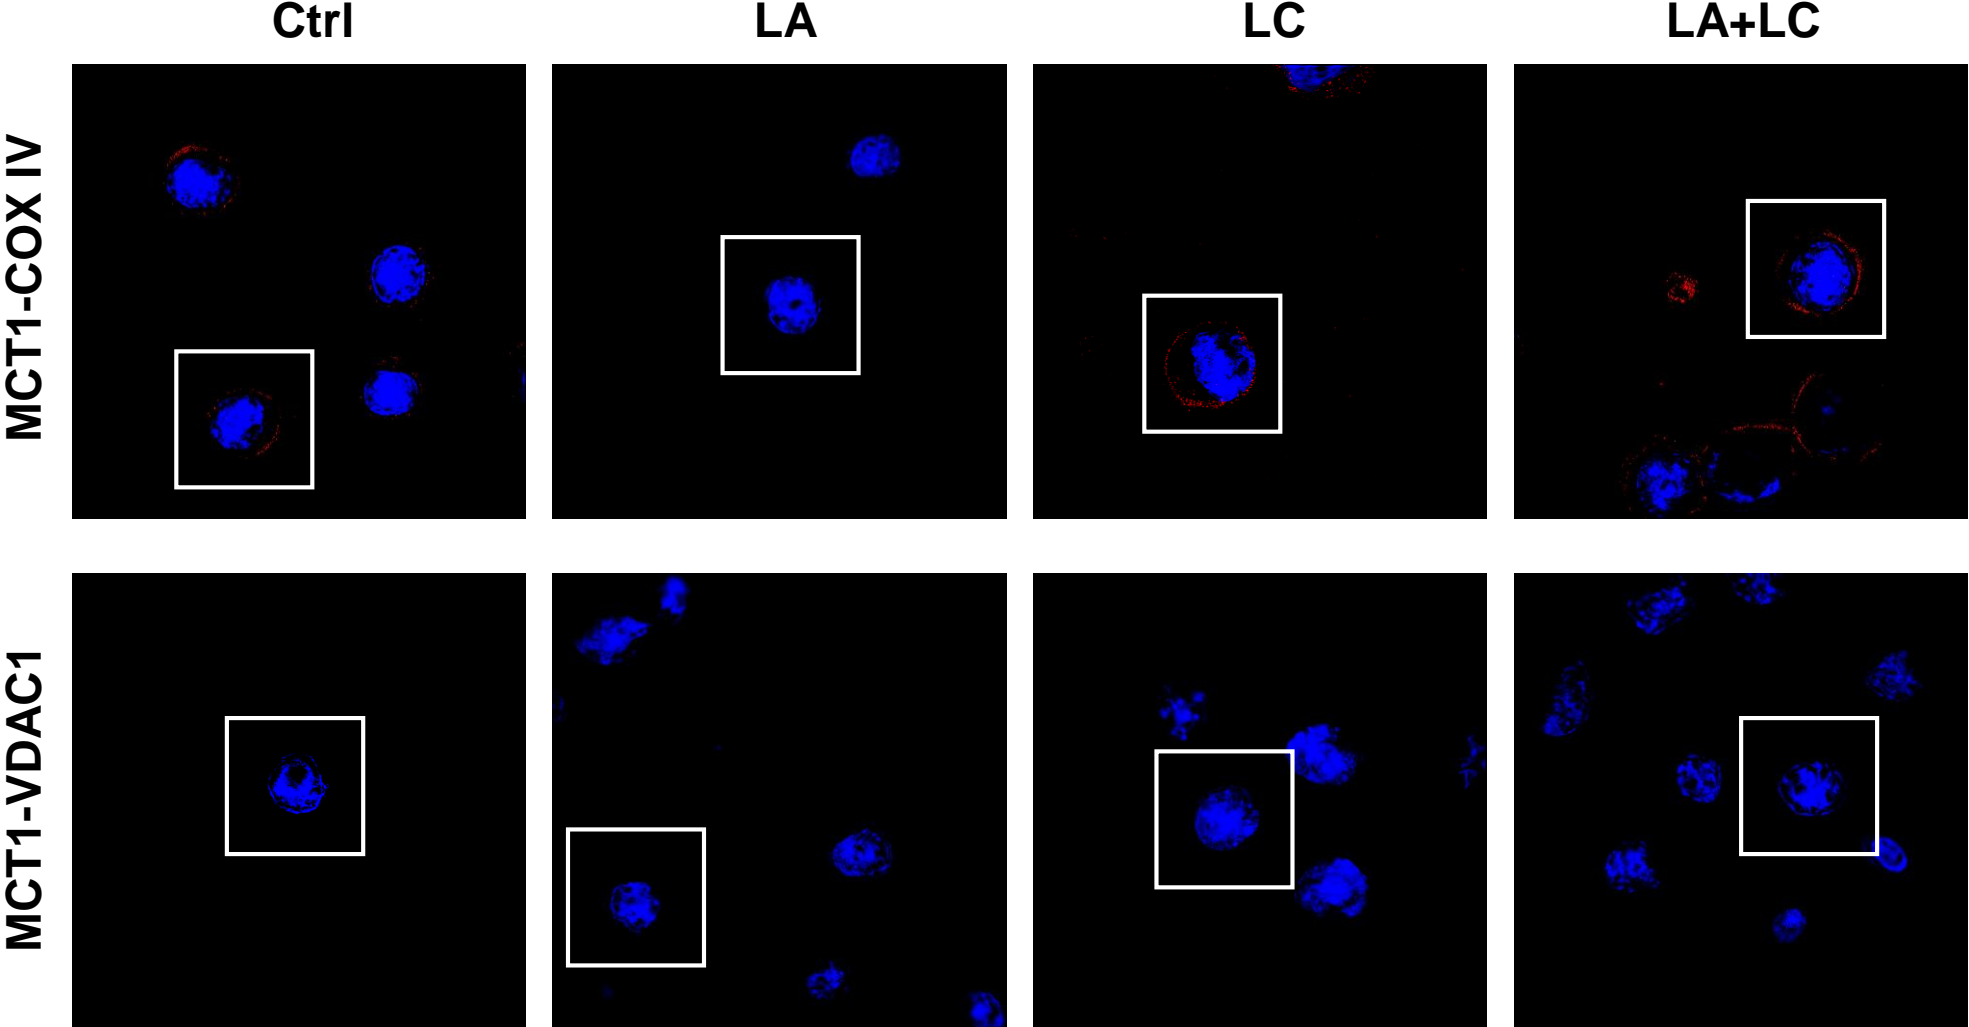

Figure 2g

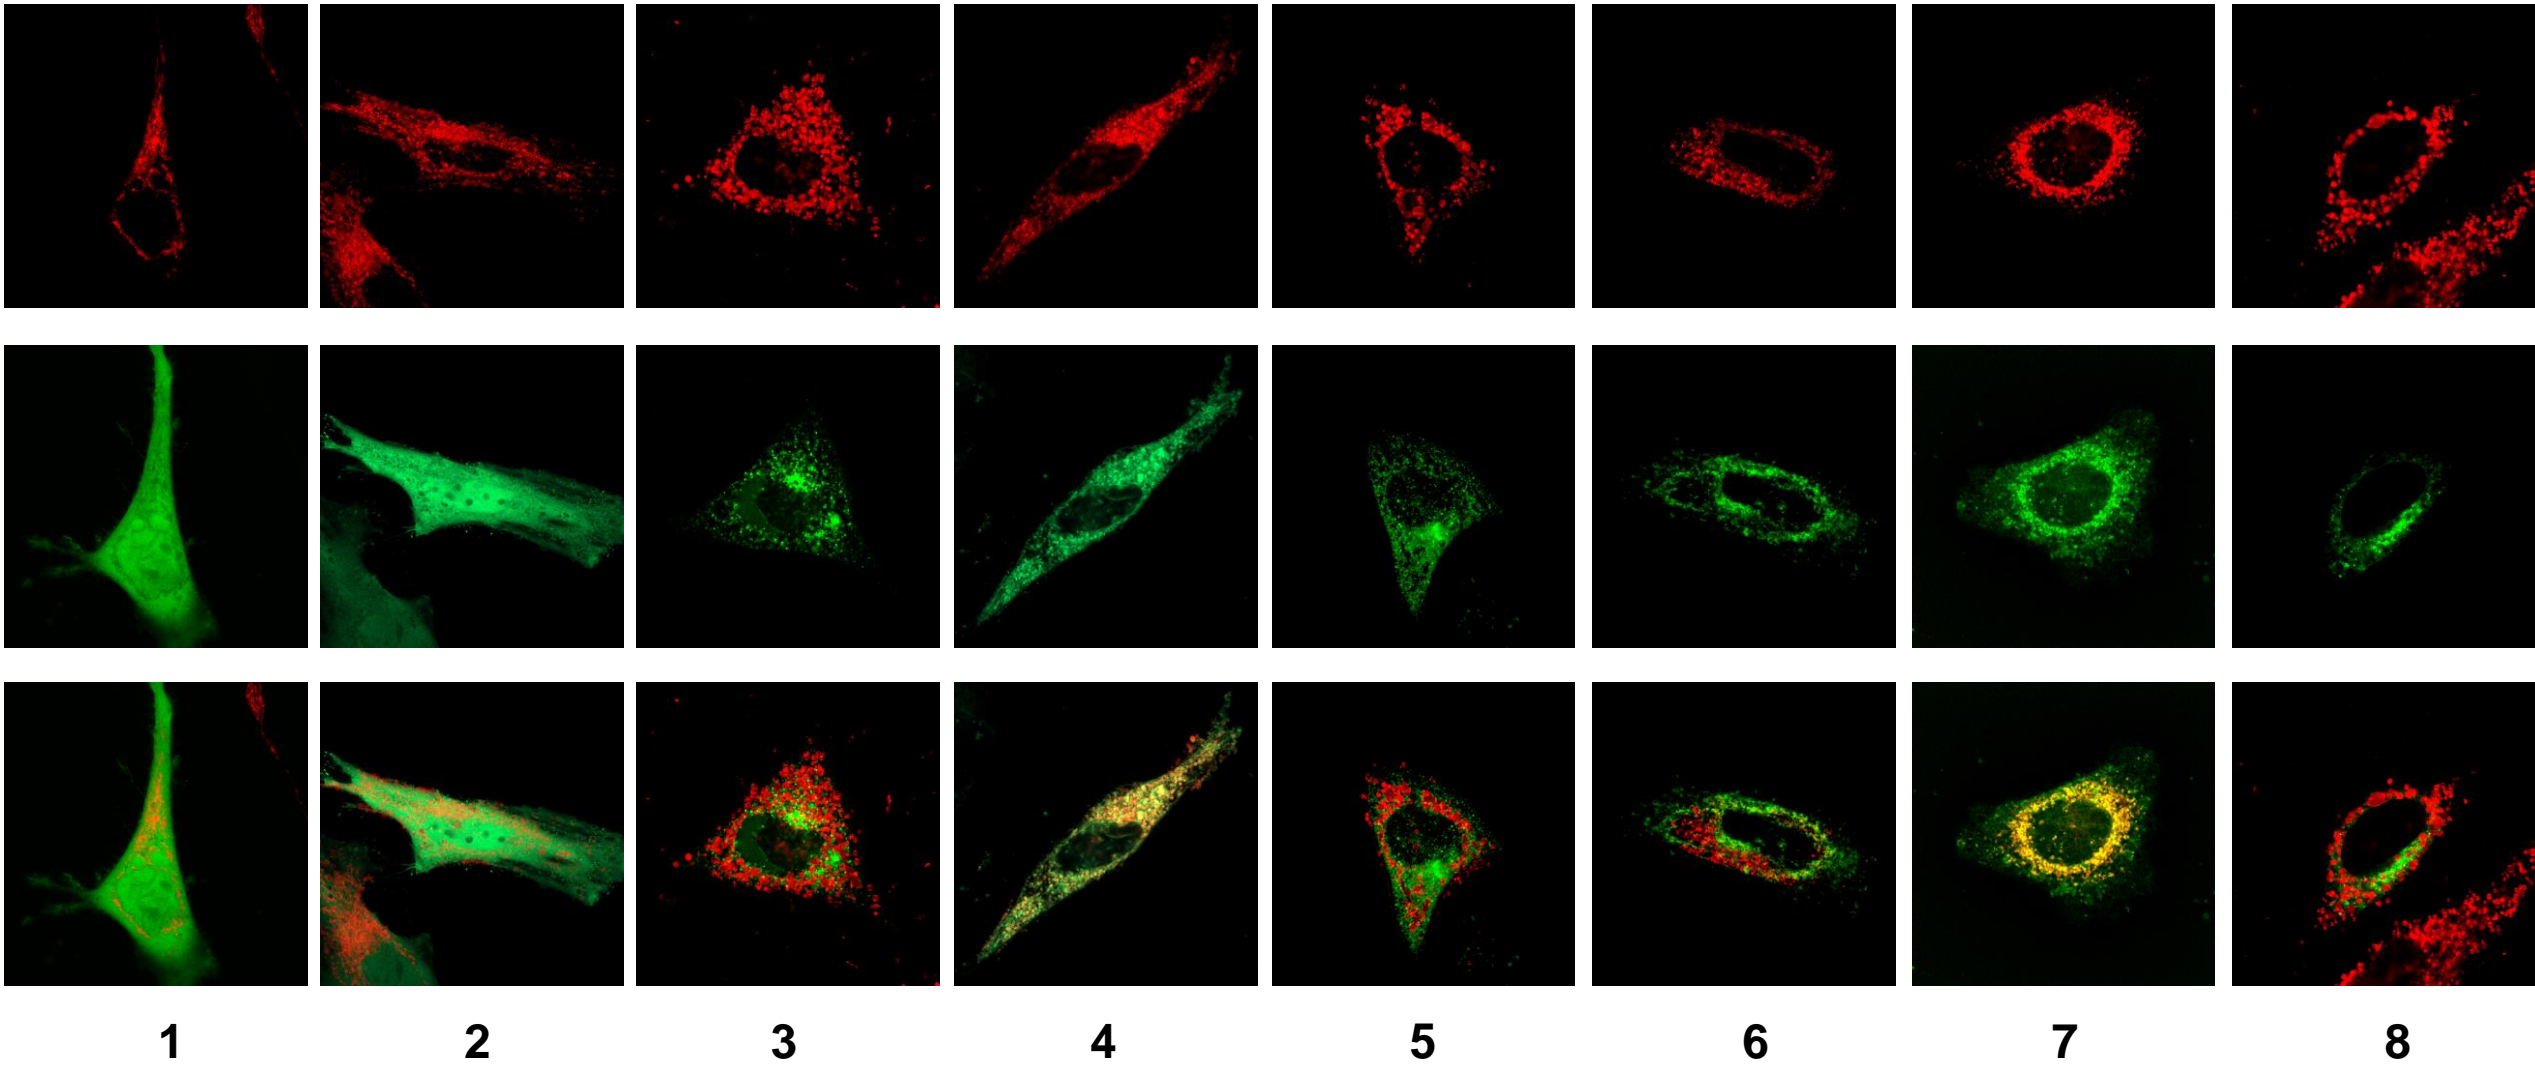

**Figure 2d**

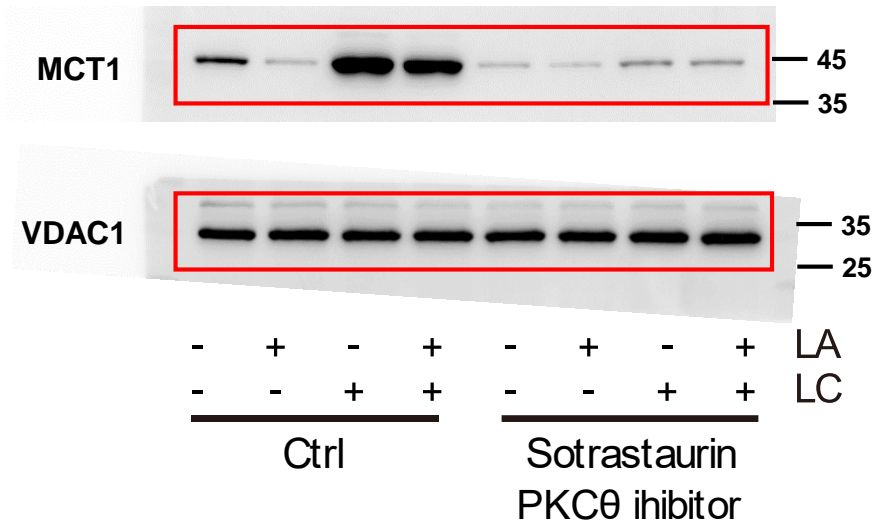

**Figure 2l**

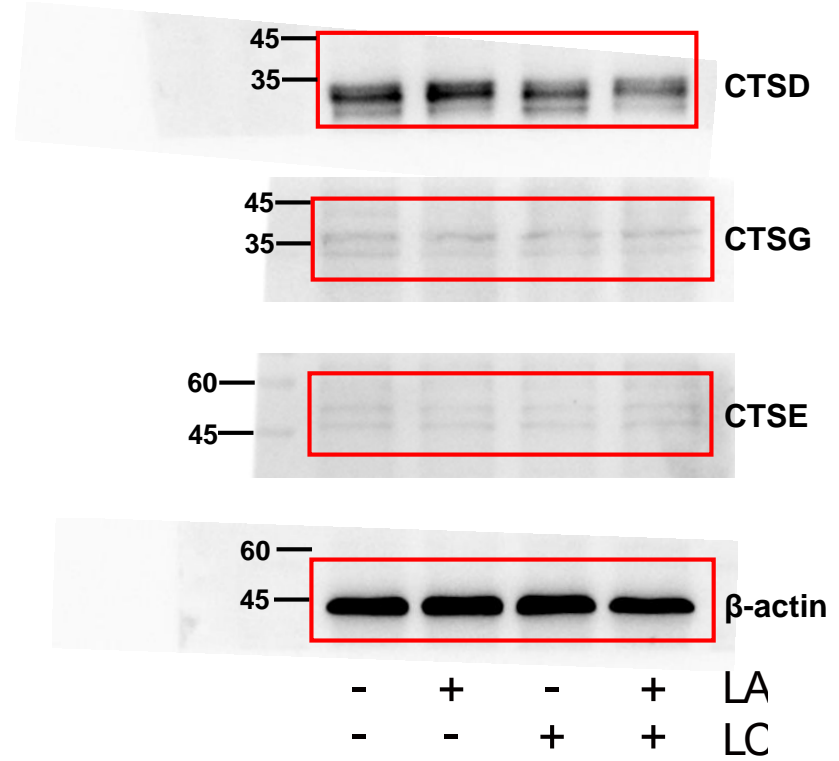

Supplement: 41590_2023_1738_MOESM5_ESM.pdf [file 41590_2023_1738_MOESM5_ESM.pdf]
