# Supplementary material for: Lithium carbonate revitalizes tumor-reactive CD8+ T cells by shunting lactic acid into mitochondria
Source: PubMed Central journal article supplement (PMC10907288; doi:10.1038/s41590-023-01738-0), 2024-01-23

Figure 3a

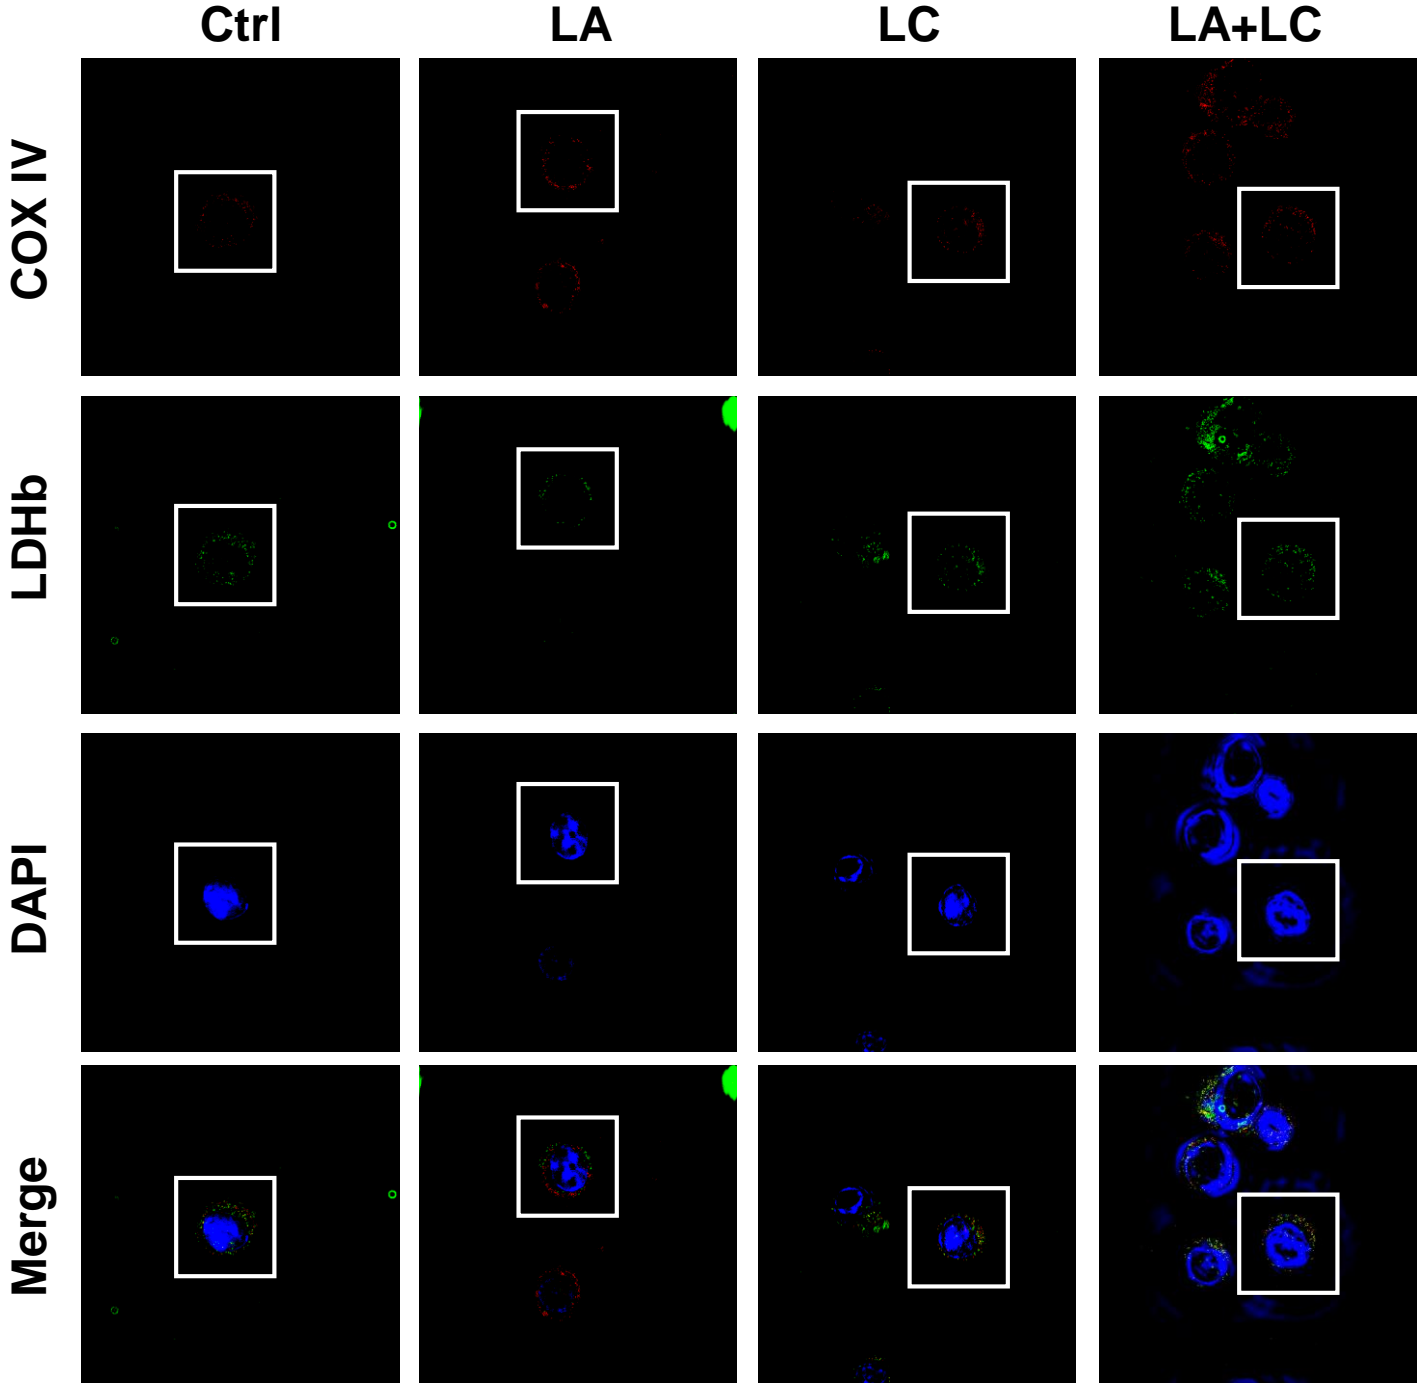

**Figure 3b**

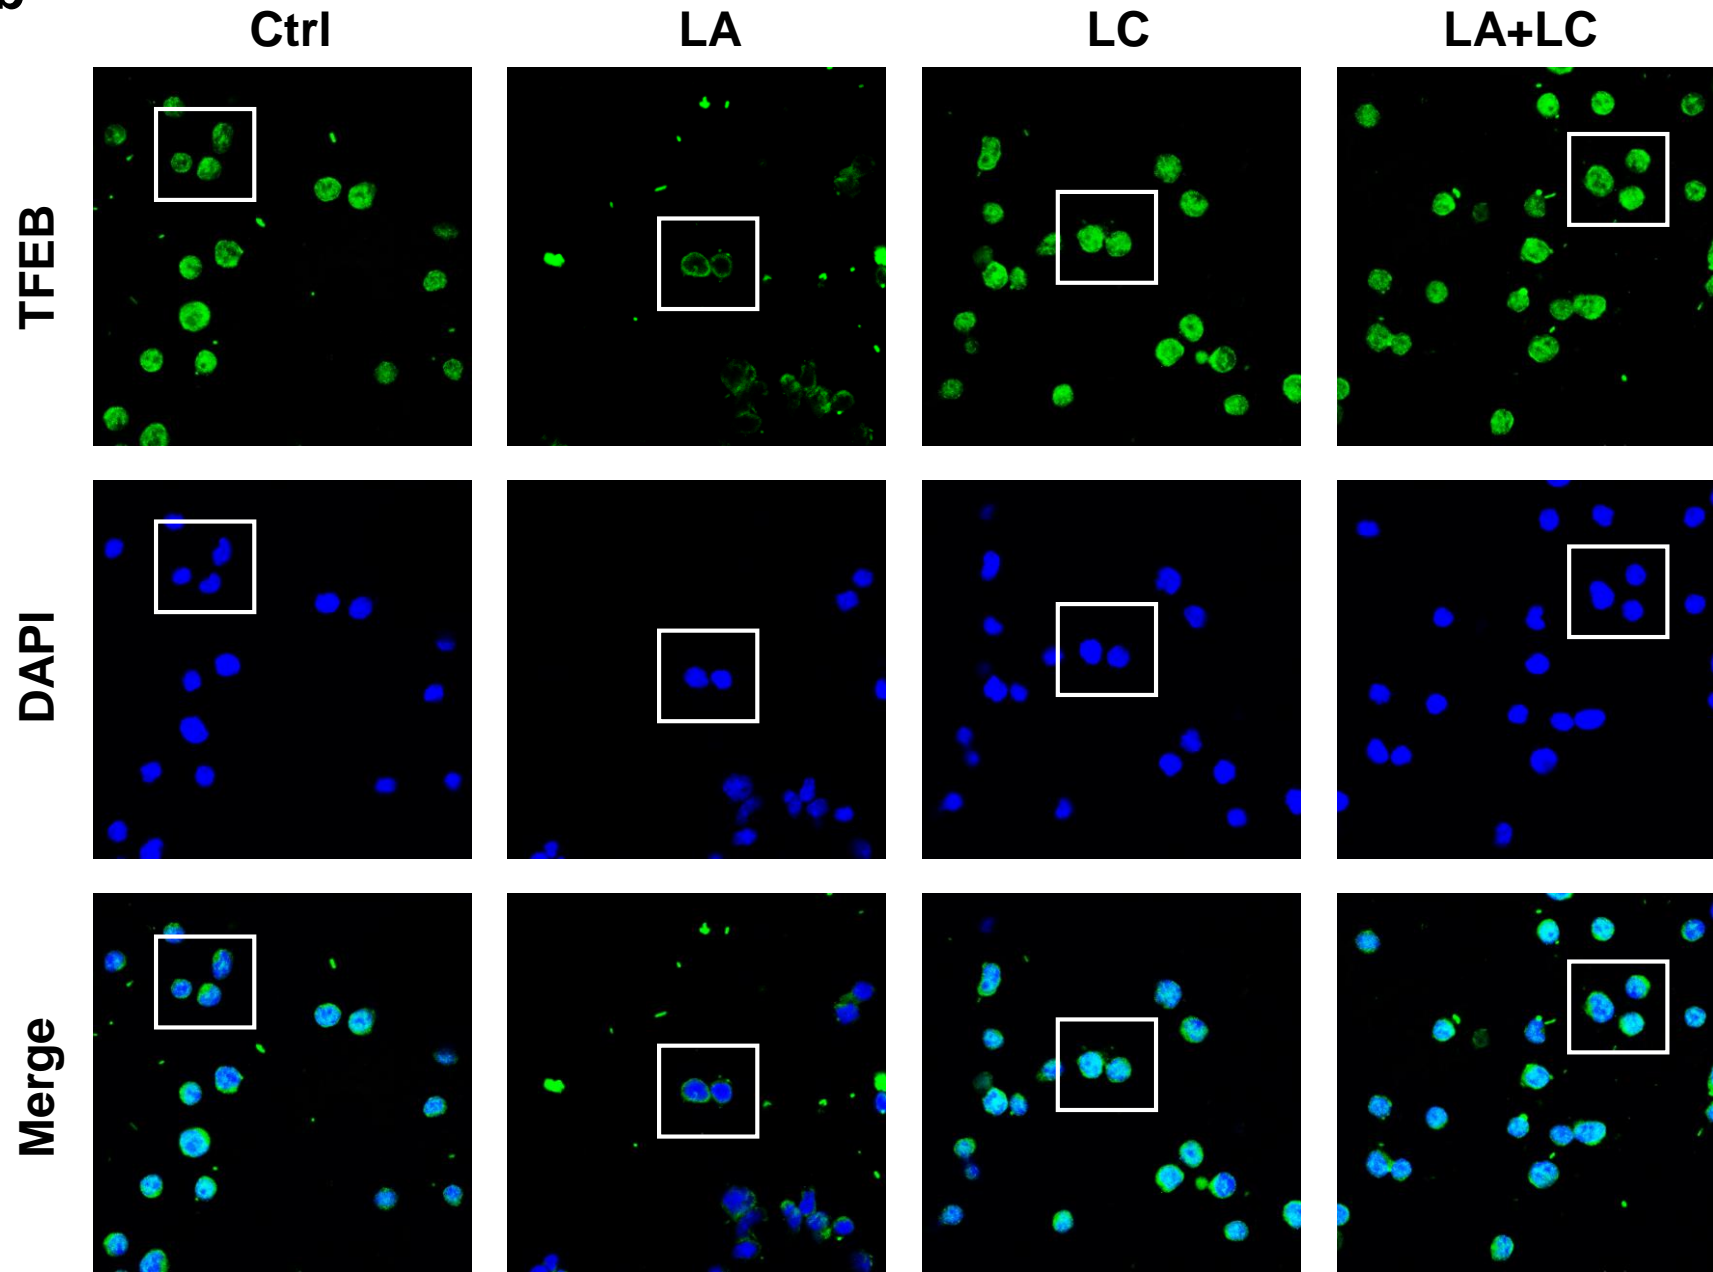

**Figure 3e**

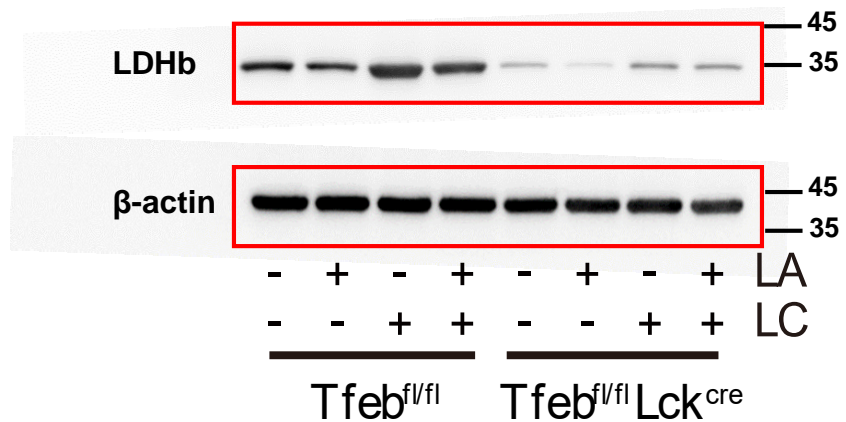

**Figure 3i**

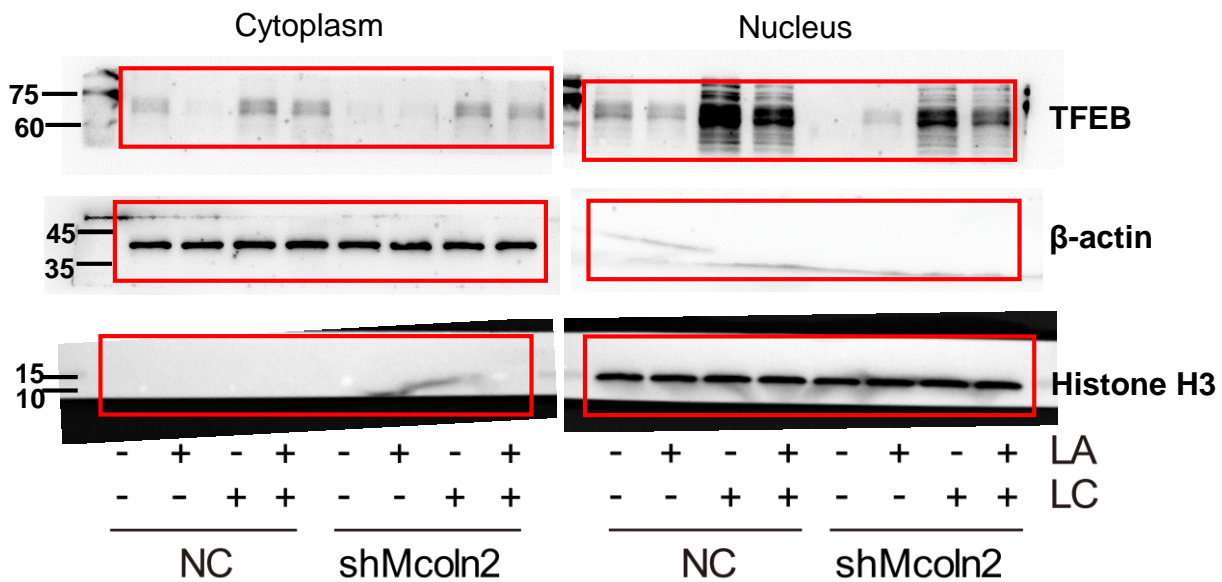

**Figure 3j**

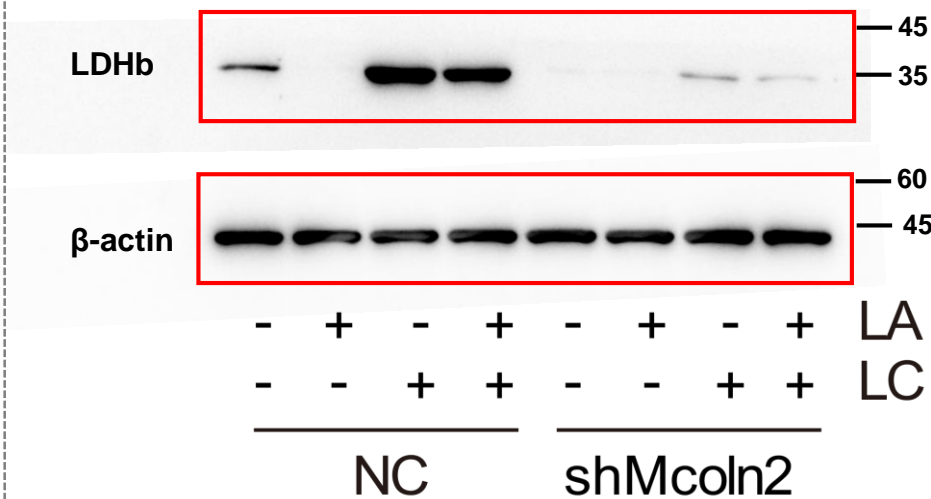

Supplement: 41590_2023_1738_MOESM7_ESM.pdf [file 41590_2023_1738_MOESM7_ESM.pdf]
