# Supplementary material for: Lithium carbonate revitalizes tumor-reactive CD8+ T cells by shunting lactic acid into mitochondria
Source: PubMed Central journal article supplement (PMC10907288; doi:10.1038/s41590-023-01738-0), 2024-01-23

**Extended Data Fig. 3a**

**isotype**

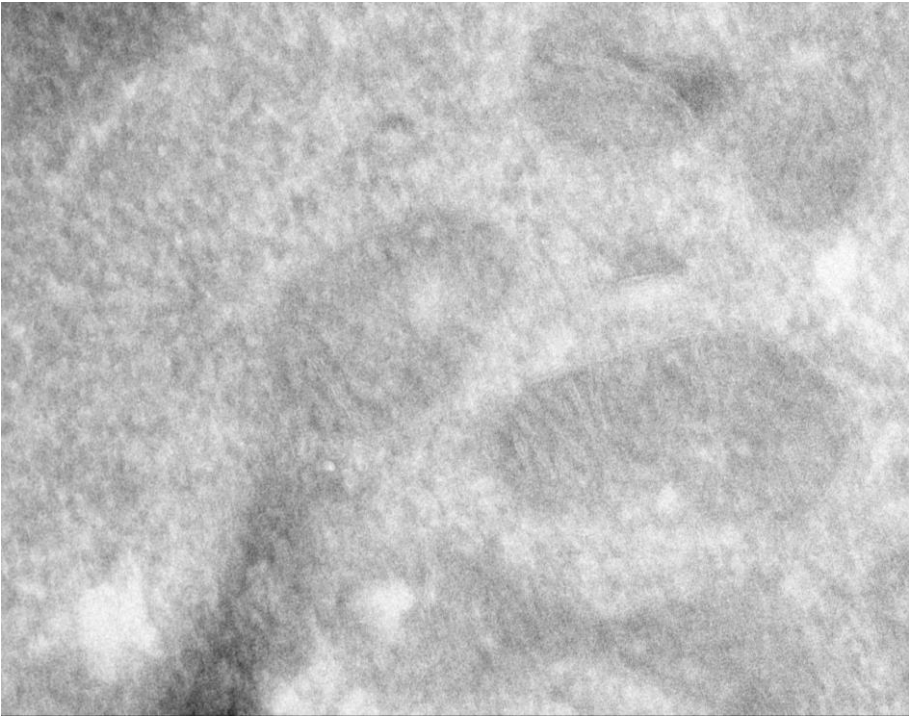

**MCT1**

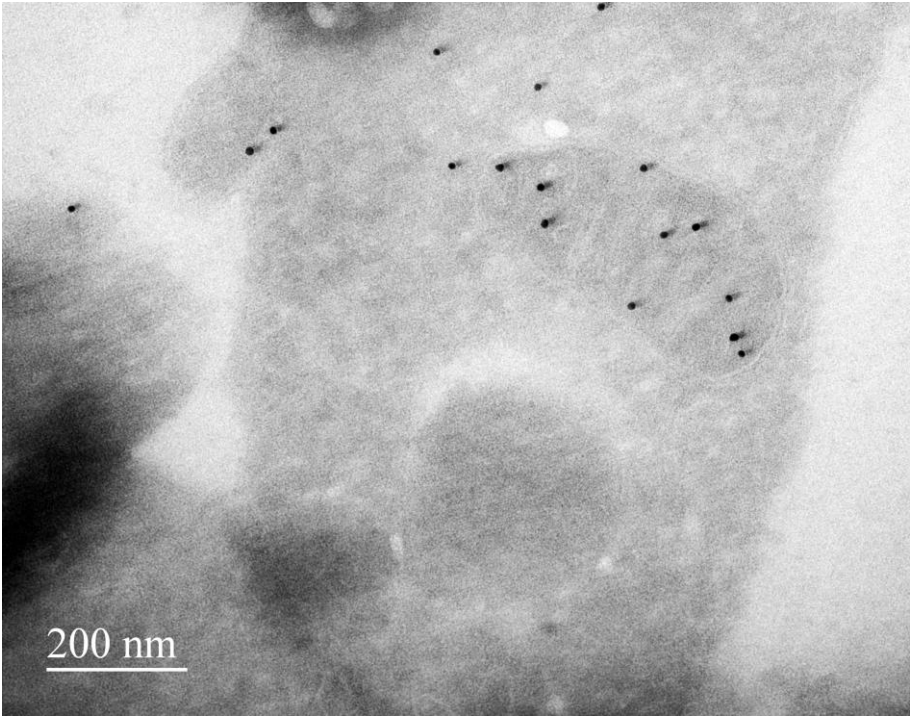

Extended Data Figure 3b

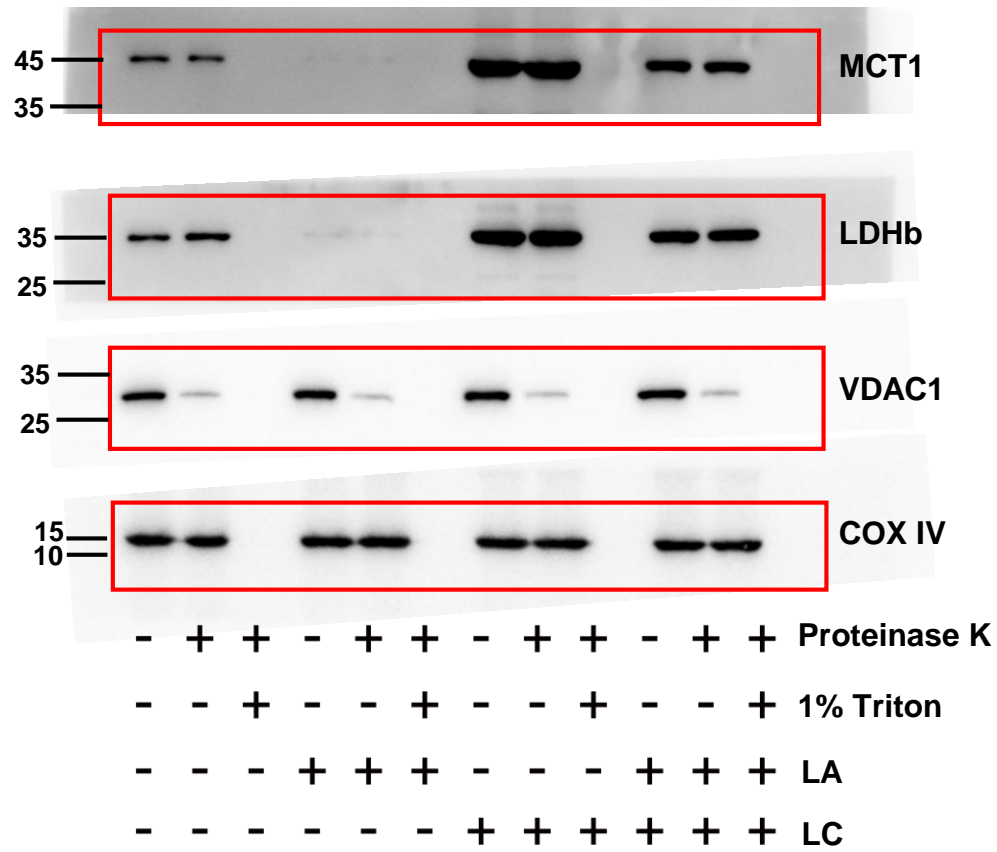

Extended Data Figure 3c

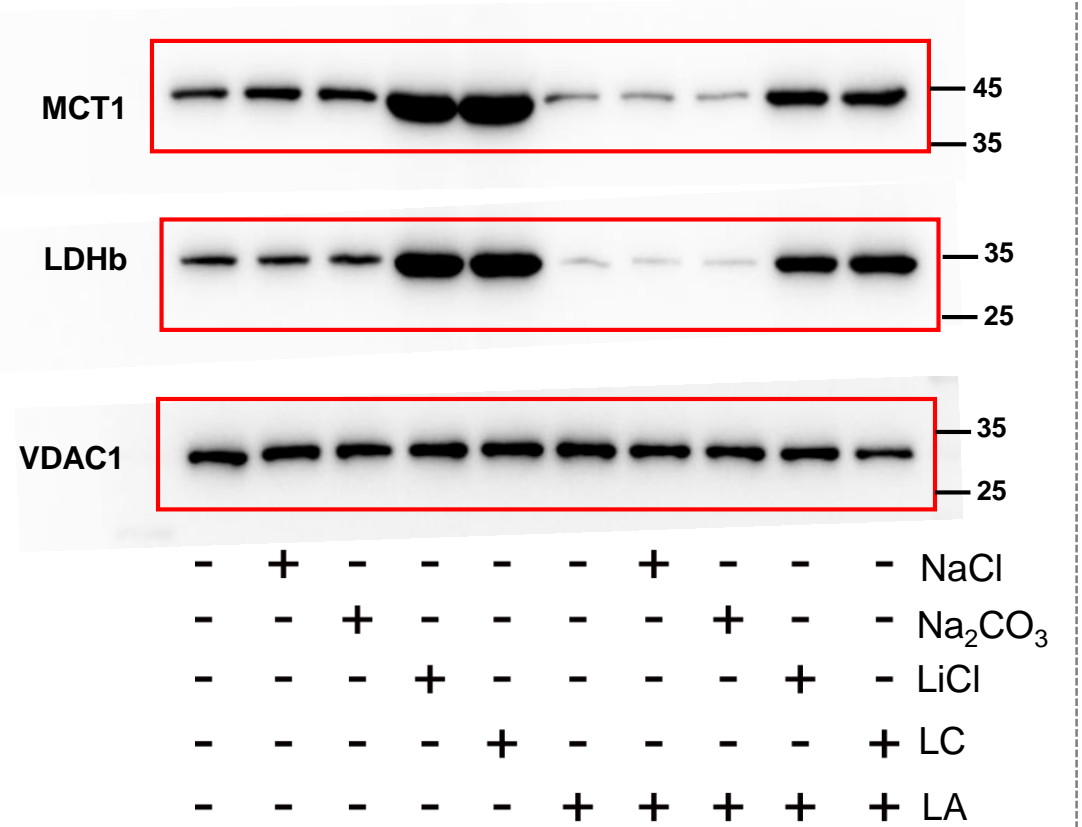

Extended Data Figure 3e

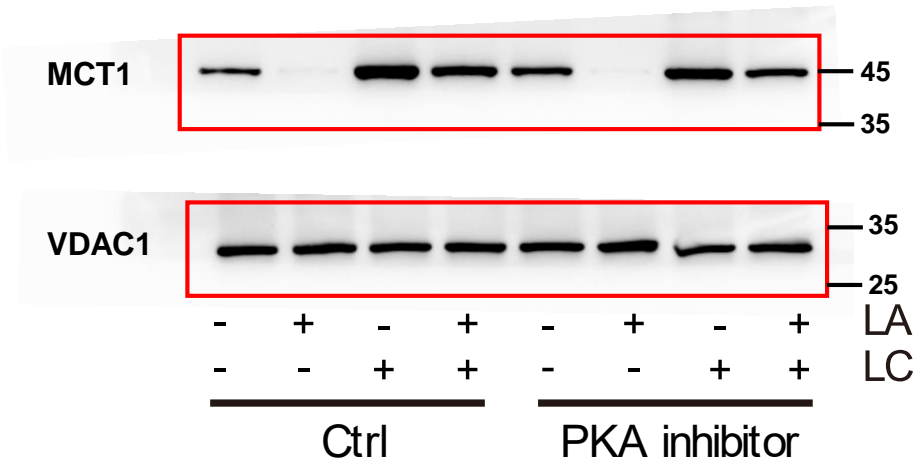

Extended Data Figure 3e

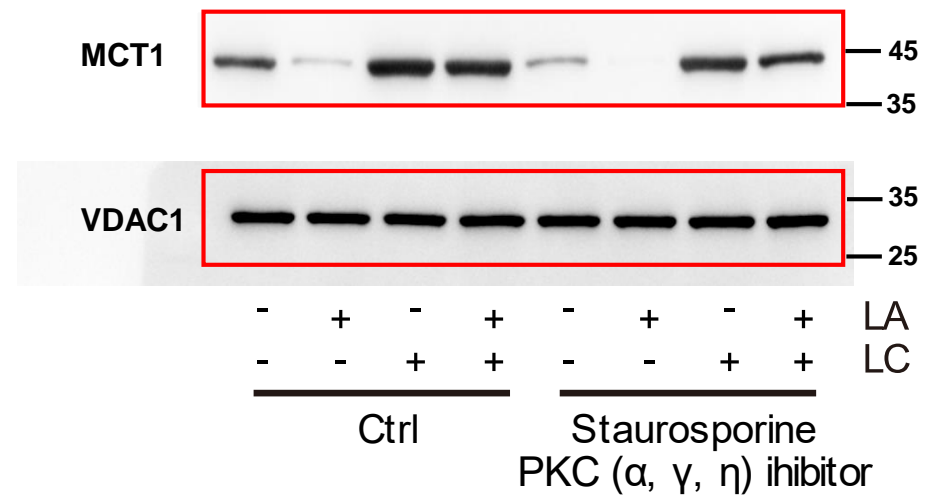

Extended Data Figure 3e

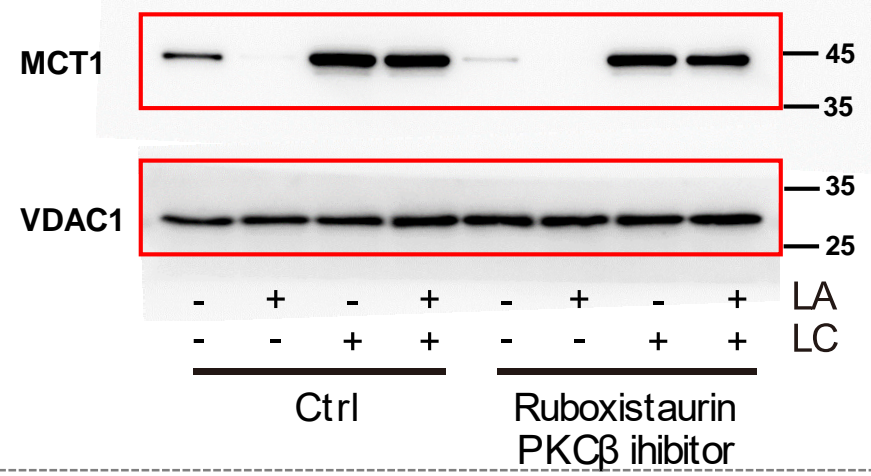

Extended Data Figure 3g

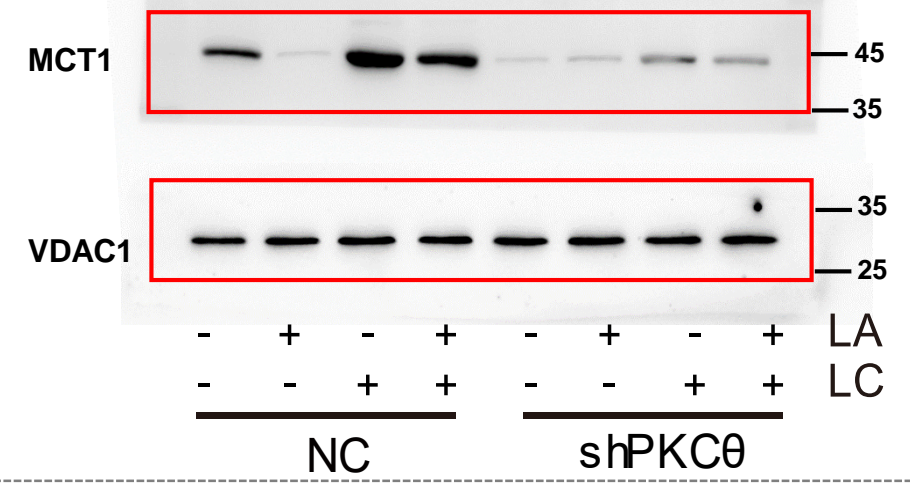

Extended Data Fig. 3i

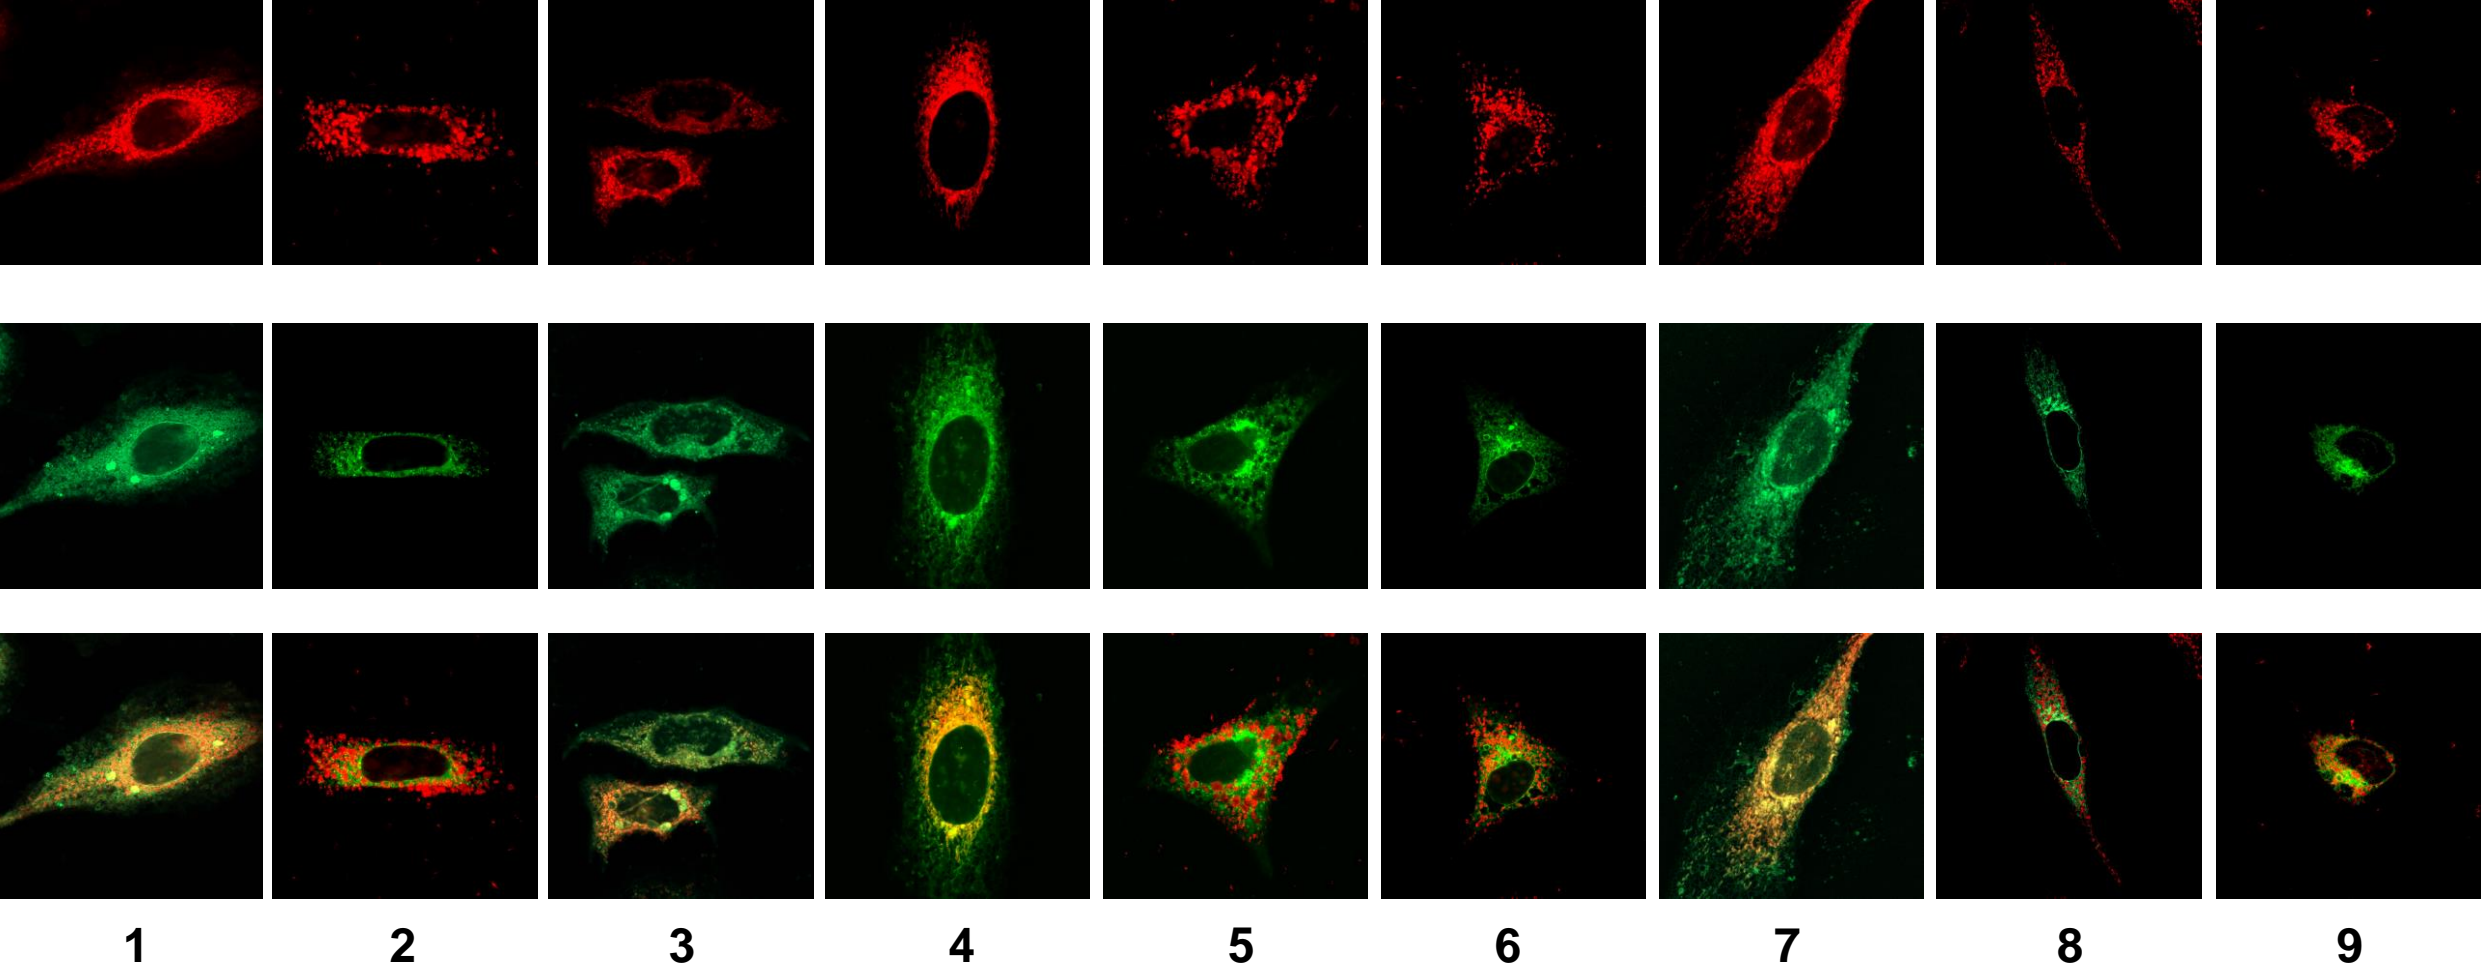

Supplement: 41590_2023_1738_MOESM12_ESM.pdf [file 41590_2023_1738_MOESM12_ESM.pdf]
