# Supplementary material for: Lithium carbonate revitalizes tumor-reactive CD8+ T cells by shunting lactic acid into mitochondria
Source: PubMed Central journal article supplement (PMC10907288; doi:10.1038/s41590-023-01738-0), 2024-01-23

Extended Data Figure 4a

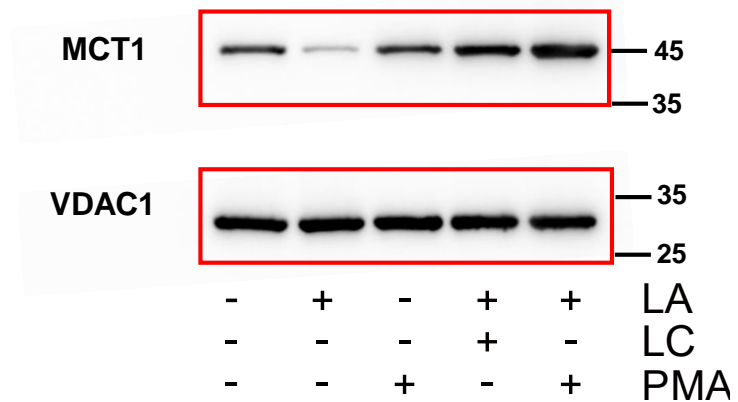

Extended Data Figure 4d

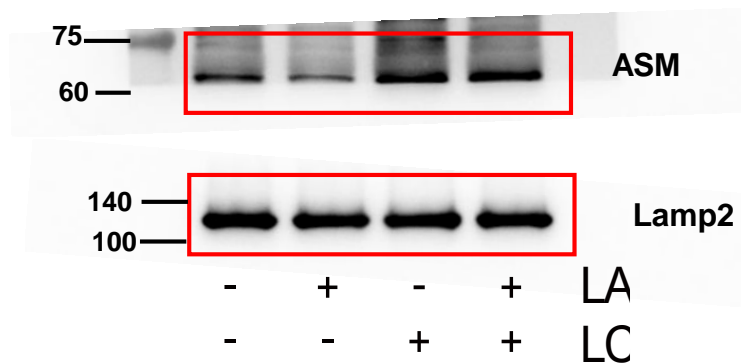

Extended Data Figure 4g

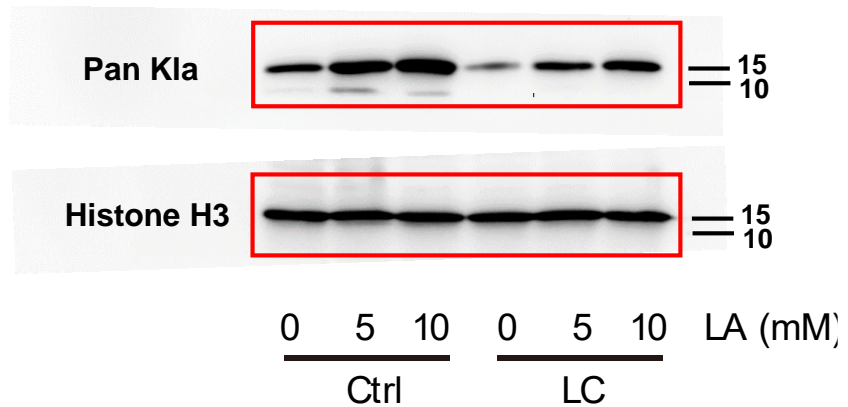

Extended Data Fig. 4c

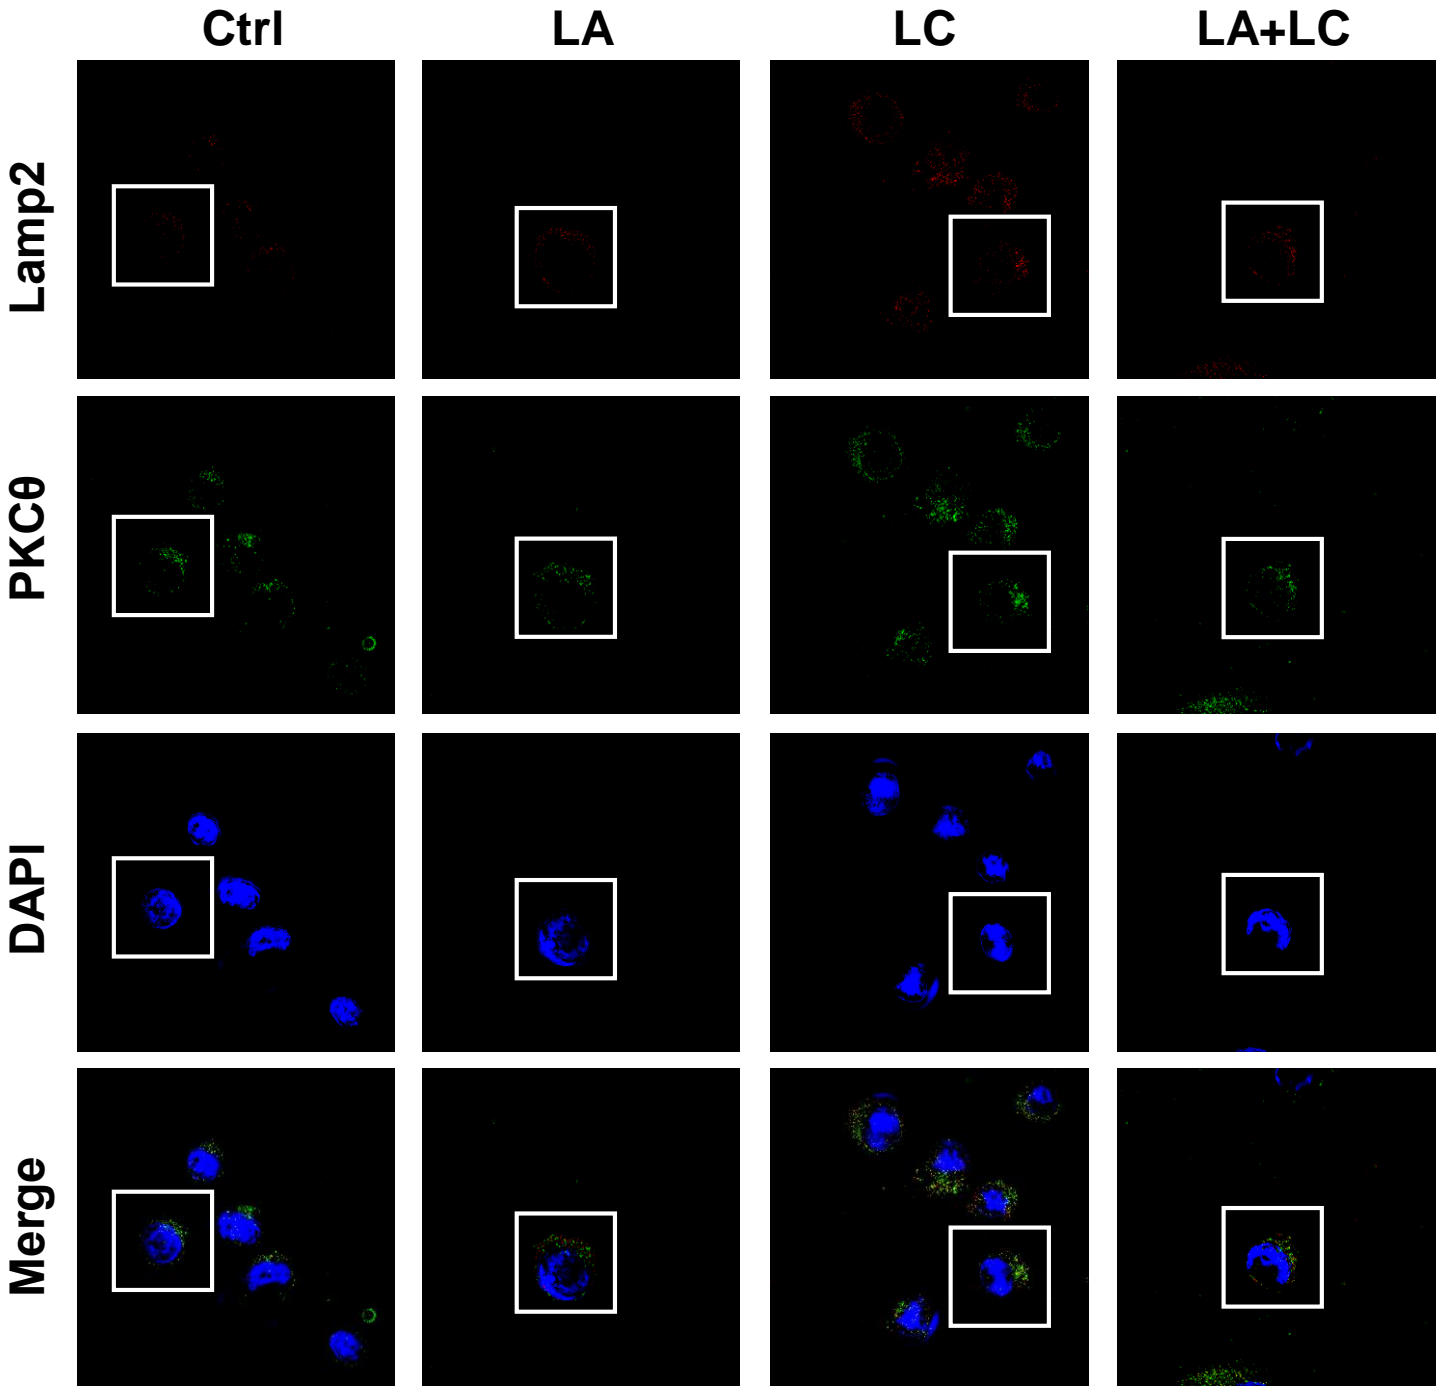

Supplement: 41590_2023_1738_MOESM13_ESM.pdf [file 41590_2023_1738_MOESM13_ESM.pdf]
